# Supplementary material for: Simultaneous Mass Spectrometric Detection of Proteins of Ten Oilseed Species in Meat Products
Source: MDPI journal article supplement (doi:10.3390/foods11142155), 2022-07-20
Supplement: s1 [file s1]

**Supplementary Table S1.** Synthesized peptide candidate markers (including *de novo* peptides) for the oilseed species chia, coconut, flaxseed, hemp, pumpkin, rapeseed, sesame, and sunflower and corresponding target proteins (peptide markers in bold were selected for the final method; 1 = quantifier, 2 = qualifier, 3 = alternative).

| Oilseeds species | Peptide sequence           | Target Protein (NCBI Accession)                           | References |
|------------------|----------------------------|-----------------------------------------------------------|------------|
| Chia             | <b>ELQVIKPPFR (2)</b>      | 11S Globulin-like (P_042056128)                           |            |
|                  | GLSNEILAEAFDVDEETAR        | 11S Globulin-like (XP_042050047)                          |            |
|                  | <b>GPIVIVEK (1)</b>        | 11S Globulin-like (P_042056128)                           |            |
|                  | GQQHEMGNIFR                | 11S Globulin-like (XP_042050047.1)                        |            |
|                  | NLDHPTSADLYNPR             | Legumin B-like (XP_042059362)                             |            |
|                  | NTLRPNALSLPNYHPNPR (3)     | 11S Globulin Seed Storage Protein 2-like (XP_042032827.1) |            |
|                  | YQTGQSEQVYQQAR             | 2S Albumin-like (XP_042053718)                            |            |
| Coconut          | <b>EVDEVLNAPR (1)</b>      | Vicilin-like Antimicrobial Peptides 2-2 (KAG1347739.1)    |            |
|                  | GDEVAIFTPR                 | Cocosin-1 (KAG1354301.1)                                  |            |
|                  | GFSTELLAAAFGVNMELAR        | Cocosin-1 (KAG1354301.1)                                  | [1]        |
|                  | GLLLPSMSNAPR (3)           | Cocosin-1 (XP_019709412.1)                                |            |
|                  | <b>LNALEPTR (2)</b>        | Cocosin-1 (KAG1354301.1)                                  |            |
|                  | SEAGITDYFDEDNEQFR          | 11S globulin isoform 2 (AKS26849.1)                       |            |
| Flaxseed         | ANGFDGVANPDIVAR            | Chitinase IV (ABA39179.1)                                 |            |
|                  | ASEFGQQHVTGGQQTS           | Oleosin low molecular weight isoform (ABB01618.1)         |            |
|                  | AVAQEQVDK                  | Late Embryogenesis Abundant Group 1 (AFN53712.1)          |            |
|                  | AVLPQGFGATIR               | Chitinase IV (ABA39179.1)                                 |            |
|                  | <b>FFLAGNPQR (1)</b>       | <i>de novo</i>                                            |            |
|                  | <b>LIYVDQGR (2)</b>        | <i>de novo</i>                                            |            |
|                  | MQDAAGYMGQK                | Oleosin high molecular weight isoform (ABB01616.1)        | [1]        |
|                  | QDIQQGQQQEVER              | Conlinin (CAC94011.1)                                     | [1]        |
|                  | QEIQQGQQQEVQR              | Conlinin (CAC94010.1)                                     |            |
|                  | QIQEQDYLR                  | Conlinin (CAC94011.1)                                     | [1]        |
| Hemp             | EQEGLPNNVFR                | Edestin-3 (SNQ45158.1)                                    |            |
|                  | FYIAGNPHEDFPQSR (3)        | 11S Globulin (XP_030499769.1)                             | [2]        |
|                  | FYLAGNPEDEFELR             | Edestin-1 (CDP79024.1)                                    |            |
|                  | GEDLQIAPSR                 | Edestin-2 (CDP79027.1)                                    | [2]        |
|                  | <b>GTLDLVSPRL (1)</b>      | Edestin-1 (CDP79024.1)                                    | [1,2]      |
|                  | <b>ILAESFNVDTELAHK (2)</b> | Edestin-2 (CDP79027.1)                                    | [2]        |
|                  | IQSQDDFR                   | Edestin-3 (SNQ45160.1)                                    |            |
|                  | YLEEAFNVDSSTVK             | Edestin-1 (CDP79024.1)                                    | [1,2]      |
| Pumpkin          | AFYLAGNPPEEFPER            | 11S Globulin Subunit Beta (XP_022967669.1)                |            |
|                  | GLLLPQYTNAPR               | 11S Globulin Subunit Beta (XP_022967669.1)                |            |
|                  | ISNEEALR                   | 11S Globulin Subunit Beta (XP_022967669.1)                |            |
|                  | ISTANYHTLPVLR (3)          | 11S Globulin Subunit Beta (XP_023000493.1)                | [1]        |
|                  | <b>LVFVAQGFGIR (1)</b>     | 11S Globulin Subunit Beta (XP_023000493.1)                | [1]        |
|                  | VEGELEVIKPPR               | 11S Globulin Subunit Beta (XP_022995606.1)                |            |
|                  | <b>VLAEIFNINVETAR (2)</b>  | 11S Globulin Subunit Beta-like (XP_022995606.1)           |            |
| Rapeseed         | AHEAHDTSLTETTR             | Oleosin S2-2-like (XP_013677557.1)                        | [1]        |
|                  | EFQQAQHLK                  | Napin-B (XP_013743463.1)                                  |            |

|                      |                                   |                                                                |     |
|----------------------|-----------------------------------|----------------------------------------------------------------|-----|
|                      | FSTLETTLTQSSGPMGYGMPR             | Cruciferin Cru4 subunit (CAA40980.1)                           | [1] |
|                      | GSIHNNAMVLPQWNVNANAALYVTK         | Cruciferin Cru4 subunit (CAA40980.1)                           | [1] |
|                      | LTFVVHGHALMGK                     | Cruciferin Cru4 subunit (CAA40980.1)                           | [1] |
|                      | LVIEQGGLYLPTFFSSPK                | Cruciferin Cru1-like (XP_013656366.1)                          |     |
|                      | <b>NLRPFLLIAGNNPQGQQWLQGR (1)</b> | Unnamed protein (CAF2310147.1)                                 |     |
|                      | QQGQQGQQGQQMQQVVS                 | Unnamed protein (CAF2150198.1)                                 |     |
|                      | <b>QQGQQGQQQLQQVISR (2)</b>       | Napin Large Chain L2B (AAB37417.1)                             |     |
|                      | VEYWDHNNPQIR                      | Cruciferin Cru1 (XP_013696793.1)                               |     |
|                      | VGYGAGYDYGADYK                    | Oleolin S2-2-like (XP_013677557.1)                             | [1] |
|                      | VQGPFSVIRPLR                      | Cruciferin BnC1 (XP_022557043.1)                               |     |
|                      | VQGPFSVLRPPLR                     | <i>de novo</i>                                                 |     |
| Rapeseed/<br>Mustard | <b>NLRPFLLIAGNNPQGQQWLQGR</b>     | Cruciferin Cru4 Subunit (CAA40980.1)                           |     |
| Sesame               | <b>AFYLAGGVPR (2)</b>             | 11S Globulin Seed Storage Protein 2 Precursor (NP_001291336.1) | [3] |
|                      | AGNNGFEWVAFK                      | 11S Globulin Seed Storage Protein 2 Precursor (NP_001291336.1) | [1] |
|                      | DVANEANQLDLK                      | Legumin B-like Precursor (NP_001291327.1)                      |     |
|                      | FESEAGLTEFWDR                     | 11S Globulin Subunit Beta-like Precursor (NP_001291328.1)      |     |
|                      | GSQSFLSPGGR                       | 11S Globulin Seed Storage Protein 2 Precursor (NP_001291336.1) | [4] |
|                      | ISGAQPSLR (3)                     | 11S Globulin Seed Storage Protein 2 Precursor (NP_001291336.1) | [3] |
|                      | IQSEGGTTELWDER                    | 11S Globulin Seed Storage Protein 2 Precursor (NP_001291336.1) |     |
|                      | <b>LVLPEYGR (1)</b>               | Legumin B-like Precursor (NP_001291327.1)                      |     |
| Sunflower            | ALPVDVLANAYQLSR                   | 11S Globulin Seed Storage Protein G3-like (XP_021982239.1)     |     |
|                      | FFLAGNPQAQAQSQQQQQR               | 11S Globulin Seed Storage Protein G3 (XP_021988017.1)          |     |
|                      | FFLAGNPQAQSQQQQHR                 | 11S Globulin Seed Storage Protein G3-like (XP_021973262.1)     | [1] |
|                      | <b>FPILEHLR (2)</b>               | 11S Globulin Seed Storage Protein G3 (XP_021988017.1)          |     |
|                      | FPILEHLQLSADR                     | 11S Globulin Seed Storage Protein G3-like (XP_021993539.1)     |     |
|                      | <b>FPILEHLQLSAER (1)</b>          | Putative 11-S Seed Storage Protein (KAF5799341.1)              | [1] |
|                      | LPILQMVQLSAER                     | 11S Globulin Seed Storage Protein 1 (XP_021987363.1)           |     |

1. Kotecka-Majchrzak, K.; Sumara, A.; Fornal, E.; Montowska, M. Proteomic analysis of oilseed cake: a comparative study of species-specific proteins and peptides extracted from ten seed species. *J Sci. Food Agric.* **2021**, *101*, 297–306, doi:10.1002/jsfa.10643.
2. Kotecka-Majchrzak, K.; Kasalka-Czarna, N.; Sumara, A.; Fornal, E.; Montowska, M. Multispecies identification of oilseed- and meat-specific proteins and heat-stable peptide markers in food products. *Molecules* **2021**, *26*, 14, doi:10.3390/molecules26061577.
3. Huschek, G.; Bonick, J.; Lowenstein, Y.; Sievers, S.; Rawel, H. Quantification of allergenic plant traces in baked products by targeted proteomics using isotope marked peptides. *LWT-Food Sci. Technol.* **2016**, *74*, 286–293, doi:10.1016/j.lwt.2016.07.057.
4. Croote, D.; Braslavsky, I.; Quake, S.R. Addressing complex matrix interference improves multiplex food allergen detection by targeted LC-MS/MS. *Anal. Chem.* **2019**, *91*, 9760–9769, doi:10.1021/acs.analchem.9b01388.

**Supplementary Table S2.** Parameters of scheduled MRM method for alternative peptide markers for the oilseed species (MRM detection window 40s; CE = collision energy; CXP = cell exit potential; DP = declustering potential). The product ions are listed in decreasing intensity.

|           | Peptide Marker     | T <sub>R</sub> [Min] | DP [V] | m/z<br>(Charge State) | Product Ions                                                       | CE [V]   | CXP [V]  |
|-----------|--------------------|----------------------|--------|-----------------------|--------------------------------------------------------------------|----------|----------|
| Chia 3    | NTLRPNALSLPNYHPNPR | 4.21                 | 111    | 519.3 (+4)            | 483.3 (y4), 620.3 (y5), 497.7 (y8 <sup>2+</sup> )                  | 31/19/23 | 30/20/30 |
| Coconut 3 | GLLLPSMSNAPR       | 5.85                 | 71     | 628.3 (+2)            | 397.3 (b4), 430.2 (y8 <sup>2+</sup> ), 369.3 (a4)                  | 21/27/25 | 22/18/12 |
| Hemp 3    | FYIAGNPHEDFPQSR    | 4.37                 | 96     | 593.3 (+3)            | 734.4 (y13 <sup>2+</sup> ), 311.1 (b2), 677.8 (y12 <sup>2+</sup> ) | 23/25/25 | 40/28/40 |
| Peanut 3  | GTGNLELVAVR        | 6.29                 | 96     | 564.8 (+2)            | 345.2 (y3), 686.4 (y6), 557.4 (y5)                                 | 29/31/33 | 24/38/28 |
| Pumpkin 3 | ISTANYHTLPVLR      | 4.41                 | 80     | 495.6 (+3)            | 686.5 (y12 <sup>2+</sup> ), 642.9 (y11 <sup>2+</sup> ), 698.5 (y6) | 23/19/31 | 40/30/44 |
| Sesame 3  | ISGAQPSLR          | 1.04                 | 90     | 464.8 (+2)            | 472.3 (y4), 728.4 (y7), 815.4 (y8)                                 | 21/23/23 | 26/42/54 |
| Soy 3     | SQSDNFEYVSFK       | 5.19                 | 31     | 725.8 (+2)            | 381.2 (y3), 1235.6 (y10), 643.3 (y5)                               | 35/29/35 | 26/52/46 |

**Supplementary Table S3.** Peptide markers for chia, coconut, flaxseed, hemp, pumpkin, rapeseed, sesame and sunflower and their homologies (NCBI online search tool BLAST, parameters for database search: query cover = 100%, percent identity = 100%; without bacteria); Peptide 1 = quantifier, Peptide 2 = qualifier, Peptide 3 = alternative peptide marker; \*Target proteins refer to *Salvia splendens*; \*\*predicted homologies according to the NCBI database, which were not confirmed experimentally. Target proteins of pumpkin refer to *Cucurbita maxima*.

| Marker      | Peptide sequence                             | Protein                                                      | Homologies (NCBI)                                                                                                                                                                                                                                                                                                                                                             |
|-------------|----------------------------------------------|--------------------------------------------------------------|-------------------------------------------------------------------------------------------------------------------------------------------------------------------------------------------------------------------------------------------------------------------------------------------------------------------------------------------------------------------------------|
| Chia 1      | GPIVIVEK                                     | 11S Globulin-like (XP_042050047)*                            | <i>Didymodactylos carnosus</i>                                                                                                                                                                                                                                                                                                                                                |
| Chia 2      | ELQVIKPPFR                                   | 11S Globulin-like (XP_042050047)*                            |                                                                                                                                                                                                                                                                                                                                                                               |
| Chia 3      | NTLRPNALSLPNYHPNPR                           | 11S Globulin Seed Storage Protein 2-like (XP_042032827)*     | <i>Perilla frutescens</i>                                                                                                                                                                                                                                                                                                                                                     |
| Coconut 1   | EVDEVLNAPR                                   | Vicilin-like Antimicrobial Peptides 2-2 (KAG1347739)         | <i>Phoenix dactylifera</i> , <i>Elaeis guineensis</i>                                                                                                                                                                                                                                                                                                                         |
| Coconut 2   | LNALEPTR                                     | Cocosin-1 (KAG1354301)                                       | <i>Phoenix dactylifera</i> , <i>Elaeis guineensis</i>                                                                                                                                                                                                                                                                                                                         |
| Coconut 3   | GLLLPSMSNAPR                                 | Cocosin-1 (KAG1354301)                                       | <i>Elaeis guineensis</i>                                                                                                                                                                                                                                                                                                                                                      |
| Flaxseed 1  | FFLAGNPQR                                    |                                                              | <i>Actinidia chinensis</i> , <i>Buddleja alternifolia</i> **, <i>Camellia sinensis</i> **, <i>Jatropha curcas</i> **, <i>Nicotiana spp.</i> **, <i>Populus spp.</i> , <i>Ricinus communis</i> , <i>Solanum chilense</i> , <i>Solanum commersonii</i> **, <i>Solanum tuberosum</i> **, <i>Solanum lycopersicum</i> **, <i>Solanum pennellii</i> , <i>Telopea speciosissima</i> |
| Flaxseed 2  | LIYVDQGR                                     |                                                              | <i>Populus trichocarpa</i>                                                                                                                                                                                                                                                                                                                                                    |
| Hemp 1      | GTLDLVSPLR                                   | Edestin-1 (CDP79024)                                         |                                                                                                                                                                                                                                                                                                                                                                               |
| Hemp 2      | ILAESFNVDTELAHK                              | Edestin-2 (CDP79027)                                         |                                                                                                                                                                                                                                                                                                                                                                               |
| Hemp 3      | FYIAGNPHEDFPQSR                              | 11S Globulin (XP_030499769)                                  |                                                                                                                                                                                                                                                                                                                                                                               |
| Pumpkin 1   | VLAEIFNINVETAR                               | 11S Globulin Subunit Beta-like (XP_022995606)                | <i>Cucurbita argyrosperma</i> , <i>Cucurbita pepo</i> , <i>Cucurbita moschata</i>                                                                                                                                                                                                                                                                                             |
| Pumpkin 2   | LVFVAQGFGIR                                  | 11S Globulin Subunit Beta (XP_023000493)                     | <i>Cucurbita argyrosperma</i> , <i>Cucurbita pepo</i> , <i>Cucurbita moschata</i>                                                                                                                                                                                                                                                                                             |
| Pumpkin 3   | ISTANYHTLPVLR                                | 11S Globulin Subunit Beta (XP_023000493)                     | <i>Cucurbita argyrosperma</i> , <i>Cucurbita pepo</i> , <i>Cucurbita moschata</i>                                                                                                                                                                                                                                                                                             |
| Rapeseed 1  | NLRPFLLIAGNNPQGQQWLQGR                       | Unnamed Protein Product (CAF2310147.1)                       | <i>Brassica rapa</i> , <i>Arabidopsis nemorensis</i>                                                                                                                                                                                                                                                                                                                          |
|             | NLRPFLLIAGNNPQGQQWLQGR (Isomer to Rapeseed1) | Cruciferin Cru4 Subunit (CAA40980.1)                         | <i>Brassica carinata</i> , <i>Brassica cretica</i> , <i>Brassica oleracea</i> , <i>Brassica rapa</i> , <i>Sinapis alba</i> , <i>Raphanus sativus</i>                                                                                                                                                                                                                          |
| Rapeseed 2  | QQQGQQGQQLQQVISR                             | Napin Large Chain L2B (AAB37417.1)                           | <i>Brassica carinata</i> , <i>Brassica cretica</i> , <i>Brassica oleracea</i> , <i>Brassica rapa</i>                                                                                                                                                                                                                                                                          |
| Sesame 1    | AFYLAGGVPR                                   | 11S Globulin Seed Storage Protein 2 Precursor (XP_011080042) | <i>Buddleja alternifolia</i> , <i>Handroanthus impetiginosus</i>                                                                                                                                                                                                                                                                                                              |
| Sesame 2    | LVLPEYGR                                     | Legumin B-like Precursor (XP_011091309)                      | <i>Clupea harengus</i> , <i>Buddleja alternifolia</i> , <i>Dryobates pubescens</i>                                                                                                                                                                                                                                                                                            |
| Sesame 3    | ISGAQPSLR                                    | 11S Globulin Seed Storage Protein 2 Precursor (XP_011080042) | <i>Pogona vitticeps</i>                                                                                                                                                                                                                                                                                                                                                       |
| Sunflower 1 | FPILEHLQLSAER                                | Putative 11-S Seed Storage Protein (KAF5799341)              |                                                                                                                                                                                                                                                                                                                                                                               |
| Sunflower 2 | FPILEHLR                                     | 11S Globulin Seed Storage Protein G3 (XP_021988017)          | <i>Brettanomyces bruxellensis</i> , <i>Pleurotus ostreatoroseus</i> , <i>Zostera marina</i>                                                                                                                                                                                                                                                                                   |
| Sunflower 3 | FPILEHLQLSADR                                | 11S Globulin Seed Storage Protein G3-like (XP_021993539)     |                                                                                                                                                                                                                                                                                                                                                                               |

**Supplementary Table S4.** Groups of possible ingredients for the production of sausages and commercial spice mixtures, which were tested regarding cross-reactivity with the oilseed marker peptides analyzed.

| Group 1: Cereals                                        | Group 2: Millet species                                                                |
|---------------------------------------------------------|----------------------------------------------------------------------------------------|
| Barley ( <i>Hordeum vulgare</i> )                       | Golden millet ( <i>Setaria sphacelata</i> )                                            |
| Miaze ( <i>Zea mays</i> )                               | Pancile millet ( <i>Panicum miliaceum</i> )                                            |
| Oat ( <i>Avena sativa</i> )                             | Pearl millet ( <i>Pennisetum glaucum</i> )                                             |
| Rice ( <i>Oryza sativa</i> )                            | Red colen millet ( <i>Setaria italica</i> )                                            |
| Rye ( <i>Secale cereale</i> )                           | Silver millet ( <i>Panicum miliaceum</i> )                                             |
| Spelt ( <i>Triticum aestivum</i> subsp. <i>spelta</i> ) | Sorghum millet ( <i>Sorghum bicolor</i> )                                              |
| Tricitale ( <i>Tschem.-Seys. ex Müntzing</i> )          | Teff ( <i>Eragrostis tef</i> )                                                         |
| Wheat ( <i>Triticum aestivum</i> )                      | Yellow colen millet ( <i>Setaria italica</i> )                                         |
| Group 3: Nuts                                           | Group 4: Turnips                                                                       |
| Almond ( <i>Prunus dulcis</i> )                         | Beetroot ( <i>Beta vulgaris</i> )                                                      |
| Brazil nut ( <i>Bertholletia excelsa</i> )              | Carrot ( <i>Daucus carota</i> )                                                        |
| Cashew ( <i>Anacardium occidentale</i> )                | Cultivated radish ( <i>Raphanus sativus</i> var. <i>Sativus</i> )                      |
| Hazelnut ( <i>Corylus avellana</i> )                    | Horseradish ( <i>Armoracia rusticana</i> )                                             |
| Macadamia ( <i>Macadamia spp.</i> )                     | Mangold ( <i>Beta vulgaris</i> subsp. <i>vulgaris</i> )                                |
| Pecan nut ( <i>Carya illinoensis</i> )                  | Parsley ( <i>Petroselinum crispum</i> )                                                |
| Pine seeds ( <i>Pinus pinea</i> )                       | Parsnip ( <i>Pastinaca sativa</i> )                                                    |
| Pistachio ( <i>Pistacia vera</i> )                      | Radish ( <i>Raphanus spp.</i> )                                                        |
| Walnut ( <i>Juglans regia</i> )                         | Turnip ( <i>Brassica napus</i> subsp. <i>rapifera</i> )                                |
| Group 5: Legumes                                        | Group 6: Roots and Tubers                                                              |
| Brown Lentil ( <i>Lens culinaris</i> Medik.)            | Celery (tuber) ( <i>Apium graveolens</i> )                                             |
| Chick pea ( <i>Cicer arietinum</i> )                    | Fennel ( <i>Foeniculum vulgare</i> )                                                   |
| Lupine (blue) ( <i>Lupinus angustifolius</i> )          | Ginger ( <i>Zingiber officinale</i> )                                                  |
| Lupine (white) ( <i>Lupinus albus</i> )                 | Jerusalem artichoke ( <i>Helianthus tuberosus</i> )                                    |
| Lupine (yellow) ( <i>Lupinus luteus</i> )               | Manioc ( <i>Manihot esculenta</i> )                                                    |
| Pea ( <i>Pisum sativum</i> )                            | Potato ( <i>Solanum tuberosum</i> )                                                    |
| Red Lentil ( <i>Lens culinaris</i> .)                   | Sweet Potato ( <i>Ipomoea batatas</i> )                                                |
| Group 7: Fruit Vegetables                               | Group 8: Vegetables cabbage                                                            |
| Avocado ( <i>Persea americana</i> Mill)                 | Broccoli ( <i>Brassica oleracea</i> var. <i>italica</i> Plenck)                        |
| Chili ( <i>Capsicum spp.</i> )                          | Brussel sprouts ( <i>Brassica oleracea</i> var. <i>gemmifera</i> )                     |
| Cucumber ( <i>Cucumis sativus</i> )                     | Cabbage ( <i>Brassica oleracea</i> convar. <i>capitata</i> var. <i>alba</i> )          |
| Eggplant ( <i>Solanum melongena</i> )                   | Cauliflower ( <i>Brassica oleracea</i> var. <i>botrytis</i> )                          |
| Habanero ( <i>Capsicum chinense</i> )                   | Kale ( <i>Brassica oleracea</i> var. <i>sabellica</i> )                                |
| Olive ( <i>Olea europaea</i> )                          | Kohlrabi ( <i>Brassica oleracea</i> var. <i>gongylodes</i> )                           |
| Paprika ( <i>Capsicum annum</i> )                       | Red cabbage ( <i>Brassica oleracea</i> convar. <i>capitata</i> var. <i>rubra</i> )     |
| Tomato ( <i>Solanum lycopersicum</i> )                  | Savoy cabbage ( <i>Brassica oleracea</i> convar. <i>capitata</i> var. <i>sabauda</i> ) |
| Group 9: Other                                          | Group 10: Leafy Vegetables                                                             |
| Asparagus ( <i>Asparagus officinalis</i> )              | Artichoke ( <i>Cynara cardunculus</i> subsp. <i>scolymus</i> )                         |
| Bamboo ( <i>Bambusoideae</i> Lueres.)                   | Celery (sheets) ( <i>Apium graveolens</i> )                                            |
| Mustard (yellow/white) ( <i>Sinapis alba</i> )          | China cabbage ( <i>Brassica rapa</i> subsp.)                                           |
| Mustard (brown) ( <i>Brassica juncea</i> )              | Pak choi ( <i>Brassica rapa</i> subsp. <i>Chinensis</i> )                              |
| Mustard (black) ( <i>Brassica nigra</i> )               | Spinach ( <i>Spinacia oleracea</i> )                                                   |
| Poppy ( <i>Papaver</i> )                                |                                                                                        |
| Group 11: Fungi & Algae                                 | Group 12: Beans                                                                        |
| Champignon ( <i>Agaricus spp.</i> )                     | Black turtle bean ( <i>Phaseolus vulgaris</i> )                                        |
| Chanterelle ( <i>Cantharellus cibarius</i> )            | Broad bean ( <i>Vicia faba</i> )                                                       |
| Oyster mushroom ( <i>Pleurotus ostreatus</i> )          | Garden bean ( <i>Phaseolus vulgaris</i> )                                              |
| King trumpet mushroom ( <i>Pleurotus eryngii</i> )      | Jack bean ( <i>Canavalia ensiformis</i> )                                              |
| Nori ( <i>Porphyra C. Agardh</i> )                      | Kidney bean ( <i>Phaseolus vulgaris</i> )                                              |
| Porcino ( <i>Boletus</i> )                              | Lima bean ( <i>Phaseolus lunatus</i> )                                                 |
| Quorn ( <i>Fusarium venenatum</i> )                     | Mung bean ( <i>Vigna radiata</i> )                                                     |
| Sea-Spaghetti ( <i>Himanthalia elongata</i> )           | Navy bean ( <i>Phaseolus vulgaris</i> )                                                |
| Shiitake ( <i>Lentinula edodes</i> )                    | Pinto bean ( <i>Phaseolus vulgaris</i> )                                               |
|                                                         | Runner bean ( <i>Phaseolus coccineus</i> )                                             |

---

**Group 13: Onions & Leeks**

Garlic (*Allium sativum*)  
Leek (*Allium ampeloprasum*)  
Onion (*Allium cepa*)  
Shallot (*Allium ascalonicum*)  
Spring onion (*Allium fistulosum*)  
Wild garlic (*Allium ursinum*)

---

**Group 15: Pseudo cereals**

Amaranth (*Amaranthus*)  
Buckwheat (*Fagopyrum* Mill.)  
Quinoa (*Chenopodium quinoa*)

---

**Group 17: Spices II**

Caraway (*Carum carvi*)  
Cloves (*Dianthus*)  
Coriander (*Coriandrum sativum*)  
Mace (*Myristicae arillus*)  
Majoram (*Origanum majorana*)  
Nutmeg (*Myristica fragrans*)

---

**Group 14: Special fruits & thickeners**

Apple (*Malus* Mill.)  
Banana (*Musa × paradisiaca*)  
Black currant (*Ribes nigrum*)  
Carob bean gum (*Ceratonia siliqua*)  
Jackfruit (*Artocarpus heterophyllus*)  
Orange (*Citrus sinensis*)  
Psyllium husks (*Plantago indica*)

---

**Group 16: Spices I**

Cardamom (*Elettaria cardamomum*)  
Fenugreek (*Trigonella foenum-graecum*)  
Lovage (*Levisticum officinale*)  
Turmeric (*Curcuma longa*)  
Sage (*Salvia*)

---

**Group 18: Commercial spice mixtures**

Bavarian veal sausages  
“Bratwurst”  
Blood sausages/“Pressack” red  
Curry (for various sausages)  
Emulsion-type sausages (“Lyoner”)  
Frankfurter-type sausages  
“Gelbwurst”  
Ham sausages  
Liver sausage

**Supplementary Table S5.** Parameters of scheduled MRM method for peptide markers of casein and pork (MRM detection window 40 s; CE = collision energy; CXP = cell exit potential; DP = declustering potential). The product ions are listed in decreasing intensity.

|          | Peptide Marker      | t <sub>R</sub><br>[Min] | DP<br>[V] | m/z<br>(Charge State) | Product Ions                                        | CE [V]   | CXP [V]  |
|----------|---------------------|-------------------------|-----------|-----------------------|-----------------------------------------------------|----------|----------|
| Casein 1 | YLGYLEQLLR          | 7.65                    | 156       | 634.4 (+3)            | 991.6 (y8), 334.2 (b3), 658.4 (y5)                  | 29/31/29 | 54/16/34 |
| Casein 2 | FFVAPFPEVFGK        | 8.38                    | 116       | 692.9 (+2)            | 394.2 (b3), 920.5 (y8), 465.2 (b4)                  | 29/25/23 | 24/48/22 |
| Mustard  | ALPLEVITNAYQISLEEAR | 9.53                    | 121       | 710.7 (+2)            | 504.2 (y4), 817.a (y7), 617.3 (y5)                  | 25/29/21 | 30/40/32 |
| Pork 1   | SALAHAVQSSR         | 0.50                    | 90        | 376.2 (+2)            | 484.8 (y9 <sup>2+</sup> ), 392.7 (y7+2), 647.3 (y6) | 13/21/21 | 26/18/32 |
| Pork 2   | DTLVSQLSR           | 4.01                    | 86        | 509.8 (+2)            | 590.3 (y5), 330.2 (b3), 689.4 (y6)                  | 21/21/27 | 32/18/44 |
